# Supplementary material
Source: PubMed Central journal article supplement (PMC5462590)
Supplement: SD9.pdf [file SD9.pdf]

SUPPLEMENTAL APPENDIX

SUPPLEMENTAL APPENDIX TABLE 1  
WISC-IV core tests of cognitive ability

| Test                     | Method                                                                                                                                                                                             | Type                             | Skills                                                                                        |
|--------------------------|----------------------------------------------------------------------------------------------------------------------------------------------------------------------------------------------------|----------------------------------|-----------------------------------------------------------------------------------------------|
| Digit span               | Proctor verbally states numbers; child repeats them back in same order and in inverse order.                                                                                                       | Verbal test                      | Measures auditory short-term memory, sequencing skills, attention, and concentration          |
| Letter Number Sequencing | Proctor verbally states sequences of random letters and digits; child repeats the digits in numerical order then the letters in alphabetical order                                                 | Verbal test                      | Measures sequencing, mental manipulation, attention, short-term auditory memory               |
| Coding                   | Child is shown a legend where numbers of signs are associated with shapes; child is presented with scenarios involving matching according to the legend within a specific time limit (120 seconds) | Nonverbal test, performance test | Measures processing speed, short-term memory, perceptual abilities, motor coordination, speed |
| Symbol search            | Child scans a search group and indicates whether the target symbol(s) matches any of the symbols in the search group within a specific time limit (120 seconds)                                    | Nonverbal test, performance test | Measures processing speed, short-term visual memory, visual-motor coordination                |

Source: Wechsler Intelligence Scale for Children-Fourth Edition (WISC-IV).<sup>8</sup>

SUPPLEMENTAL APPENDIX TABLE 2

Average-treatment-effect-on-treated† (ATT) analysis of differences in infection, outcomes of nutrition, cognitive abilities, and school performance between control and intervention groups

| Variable                                                          | Intervention effect (95% CI)‡ |         |                             |               |
|-------------------------------------------------------------------|-------------------------------|---------|-----------------------------|---------------|
|                                                                   | Unadjusted                    | P value | Adjusted§                   | P value       |
| <b>Infection characteristics</b>                                  |                               |         |                             |               |
| Infection prevalence (%)                                          |                               |         |                             |               |
| Baseline                                                          | 0.07 (-0.45 to 0.60)          | 0.779   | 0.15 (-0.09 to 0.39)        | 0.209         |
| Follow-up                                                         | -0.21 (-0.73 to 0.31)         | 0.435   | -0.39 (-0.69 to -0.09)      | <b>0.011*</b> |
| Infection intensity (epg) (among samples with positive infection) |                               |         |                             |               |
| Baseline                                                          | 365.05 (-290.39 to 1,020.49)  | 0.271   | 191.98 (-171.49 to 555.46)  | 0.296         |
| Follow-up                                                         | -512.58 (-1,077.22 to 52.05)  | 0.075   | -370.37 (-679.12 to -61.62) | <b>0.019*</b> |
| <b>Nutritional indicators</b>                                     |                               |         |                             |               |
| Hemoglobin levels                                                 |                               |         |                             |               |
| Baseline                                                          | 0.31 (-3.31 to 3.93)          | 0.865   | 0.45 (-1.26 to 2.15)        | 0.604         |
| Follow-up                                                         | -0.77 (-4.57 to 3.03)         | 0.689   | -0.58 (-2.93 to 1.76)       | 0.622         |
| Anemia prevalence (%)                                             |                               |         |                             |               |
| Baseline                                                          | -0.04 (-0.38 to 0.30)         | 0.819   | -0.07 (-0.25 to 0.11)       | 0.443         |
| Follow-up                                                         | 0.15 (-0.22 to 0.52)          | 0.434   | 0.20 (-0.10 to 0.50)        | 0.185         |
| % Stunted (HAZ < -2)                                              |                               |         |                             |               |
| Baseline                                                          | 0.15 (-0.18 to 0.48)          | 0.370   | 0.10 (-0.10 to 0.30)        | 0.339         |
| Follow-up                                                         | 0.23 (-0.09 to 0.55)          | 0.154   | 0.14 (-0.14 to 0.42)        | 0.335         |
| % Underweight (WAZ < -2)                                          |                               |         |                             |               |
| Baseline                                                          | 0.28 (0.00 to 0.56)           | 0.050   | 0.28 (0.08 to 0.48)         | <b>0.007*</b> |
| Follow-up                                                         | 0.17 (-0.09 to 0.43)          | 0.209   | -0.21 (-0.50 to 0.09)       | 0.174         |
| <b>Cognitive abilities</b>                                        |                               |         |                             |               |
| Processing Speed Index Score                                      |                               |         |                             |               |
| Baseline                                                          | -0.23 (-4.74 to 4.28)         | 0.919   | 0.30 (-2.41 to 3.01)        | 0.827         |
| Follow-up                                                         | 1.17 (-2.66 to 5.01)          | 0.545   | 1.14 (-0.39 to 2.67)        | 0.142         |
| Working Memory Index Score                                        |                               |         |                             |               |
| Baseline                                                          | -0.31 (-3.07 to 2.44)         | 0.822   | -0.09 (-1.86 to 1.68)       | 0.922         |
| Follow-up                                                         | 0.49 (-2.15 to 3.12)          | 0.715   | 0.92 (-0.15 to 1.99)        | 0.093         |
| <b>School performance</b>                                         |                               |         |                             |               |
| School attendance rate (%)                                        |                               |         |                             |               |
| Baseline                                                          | 0.05 (-0.4 to 0.51)           | 0.818   | 0.06 (-0.3 to 0.43)         | 0.736         |
| Follow-up                                                         | -0.07 (-0.57 to 0.44)         | 0.796   | -0.15 (-0.59 to 0.28)       | 0.491         |
| Normalized TIMSS score                                            |                               |         |                             |               |
| Baseline                                                          | -0.08 (-0.43 to 0.26)         | 0.632   | 0.01 (-0.19 to 0.21)        | 0.912         |
| Follow-up                                                         | -0.13 (-0.43 to 0.18)         | 0.412   | -0.07 (-0.17 to 0.03)       | 0.187         |

ATT = average treatment effect on treated; CI = confidence interval; HAZ = height-for-age z-score; TIMSS = Trends in International Mathematics and Science Study; WAZ = weight-for-age z-score.

\*Bolded values indicate significance at 95% CI.

†Average-treatment-effect-on-treated (ATT) were estimated by using the initial random treatment assignment as the instrument variable for the observed compliance (whether a student took the two albendazole pills passed by the intervention team of the project).

‡CI denotes confidence interval.

§Values were adjusted for individual characteristics (gender, age, boarding status, minority identification) and household characteristics (siblings, durable assets, parental migrant worker status, parental education levels), as well as township pair-fixed effects. In the case of follow-up, values were also adjusted for the baseline value of the dependent variable.
